# Supplementary material
Source: Springer Nature journal article supplement (https://www.springermedizin.de/resource/supplementary/12985_2010_1008_MOESM12_ESM.pdf/9608936)

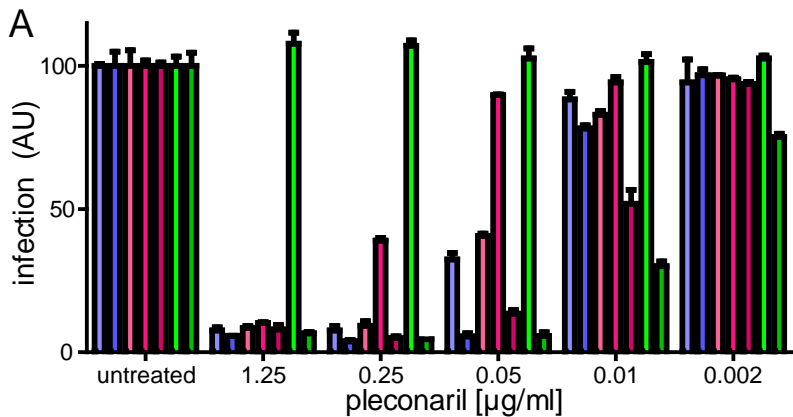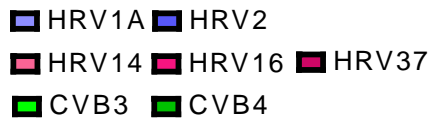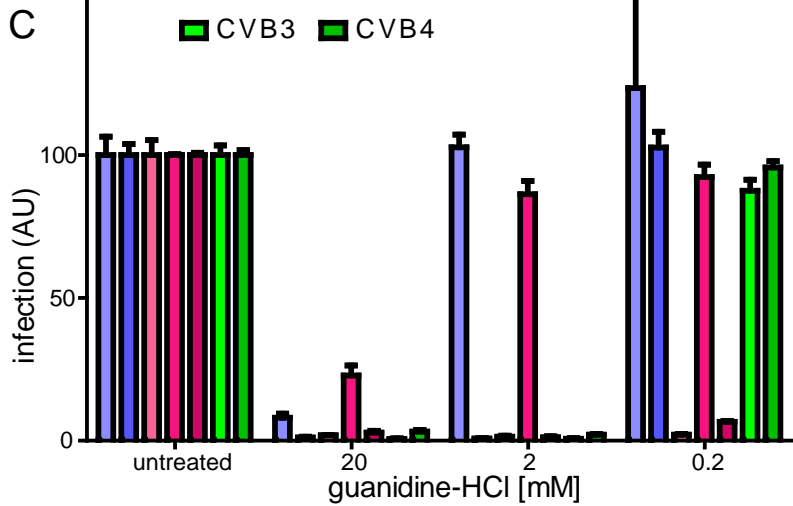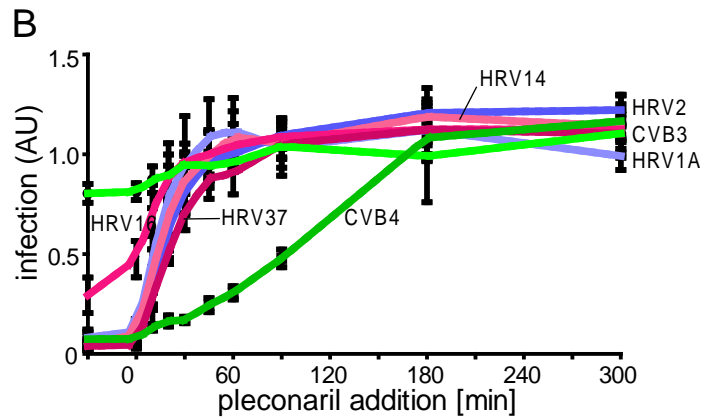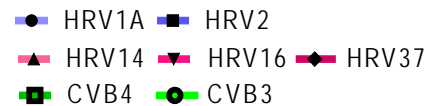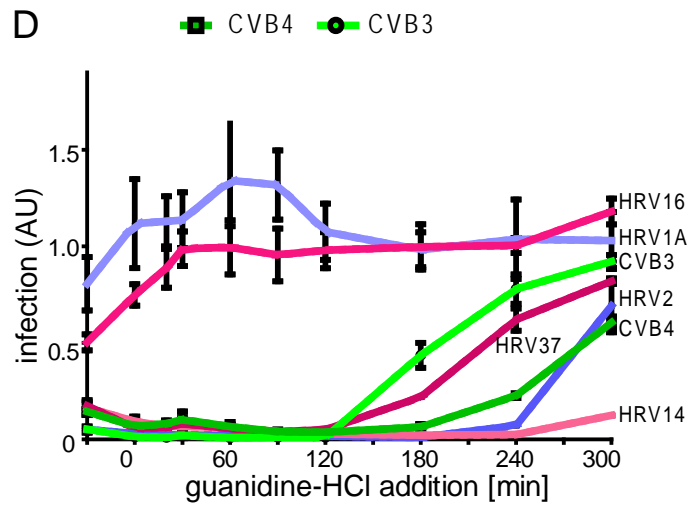

Supplement: MOESM12 [file 9608936]
